# Supplementary material for: Evaluation of the Effect of Food Products Containing Prebiotics and Bacillus subtilis HU58 on the Gut Microbial Community Activity and Community Composition Using an In Vitro M-SHIME® Model
Source: MDPI journal article supplement (doi:10.3390/app112411963), 2021-12-15
Supplement: s1 [file s1]

Archive with 1 entries (1 files):
- applsci-1479706 - Supplementary New.pdf
